# Supplementary material for: Presence and stability of SARS-CoV-2 on environmental currency and money cards in Utah reveals a lack of live virus
Source: PubMed Central journal article supplement (PMC8789161; doi:10.1371/journal.pone.0263025), 2022-01-25

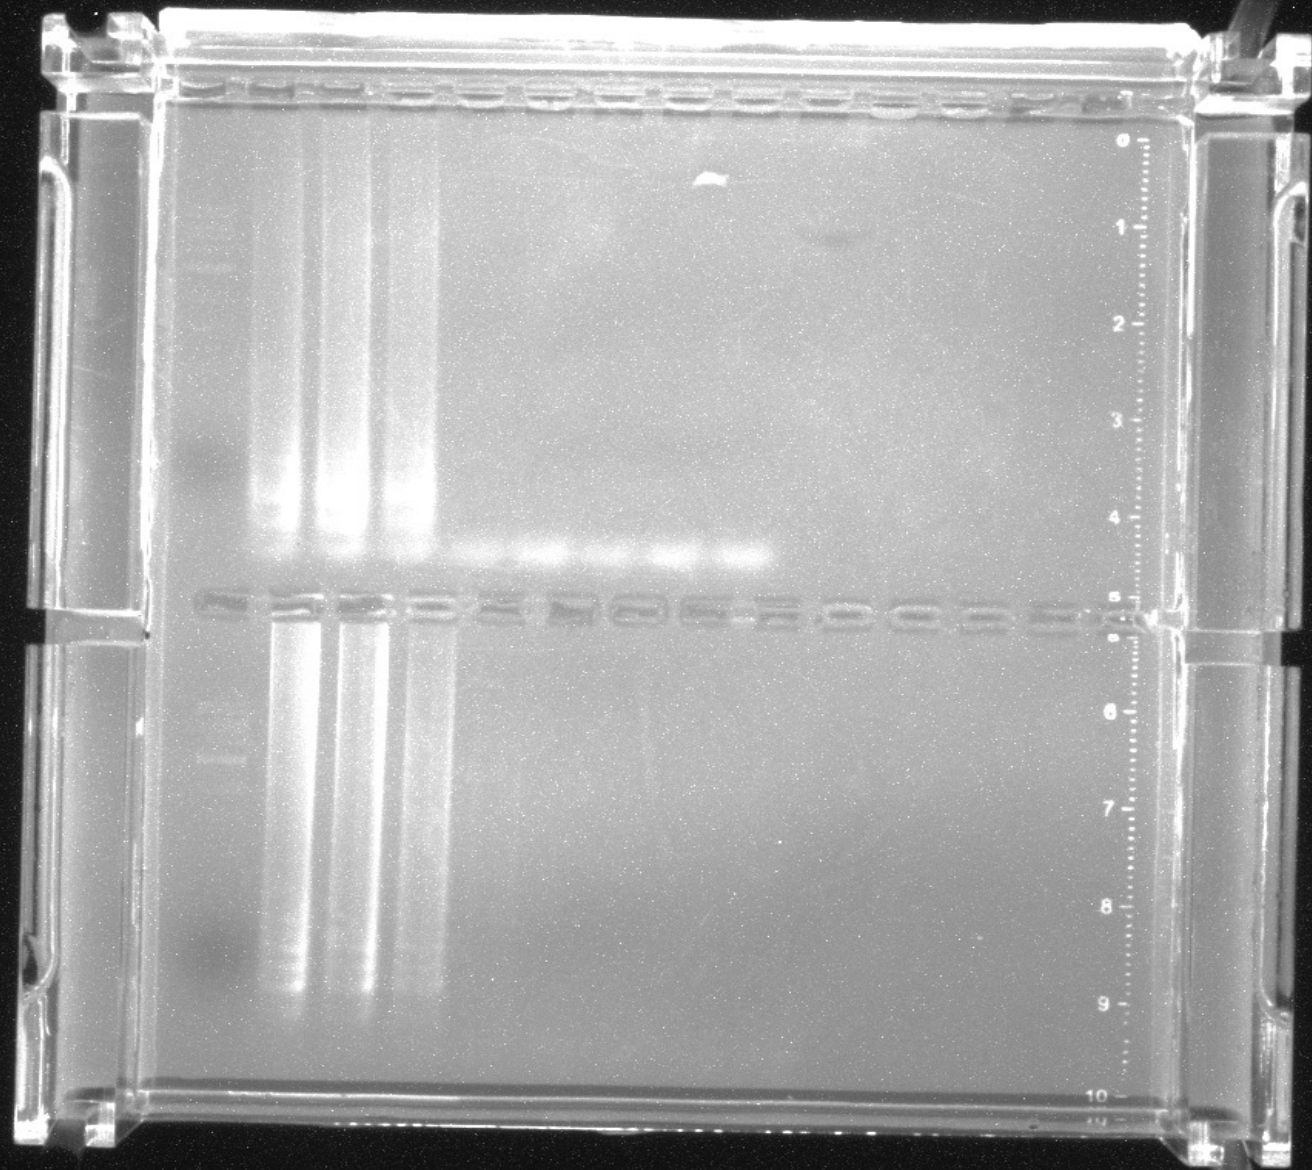

Supplement: pone.0263025.s001.pdf [file pone.0263025.s001.pdf]
